# Supplementary material
Source: Springer Nature journal article supplement (https://www.springermedizin.de/resource/supplementary/12889_2012_4899_MOESM5_ESM.pdf/9492036)

Ethiopia

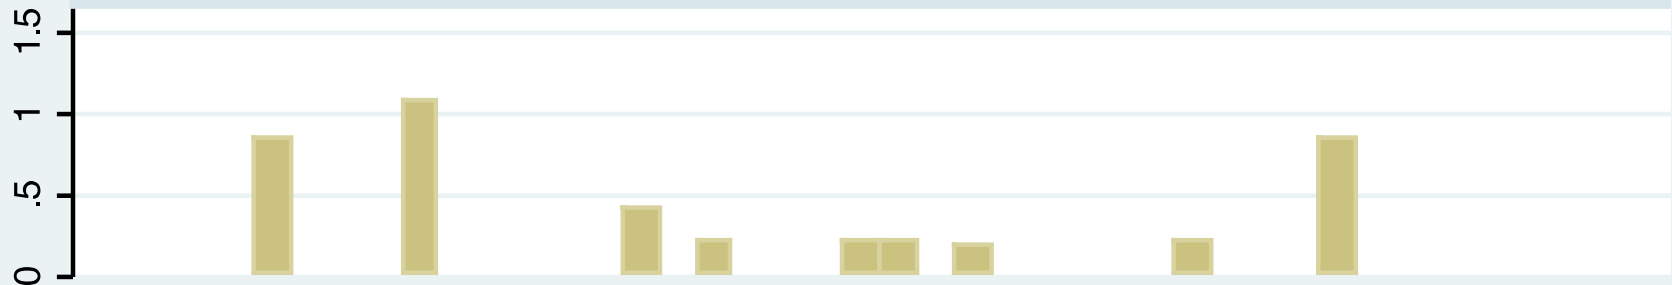

India

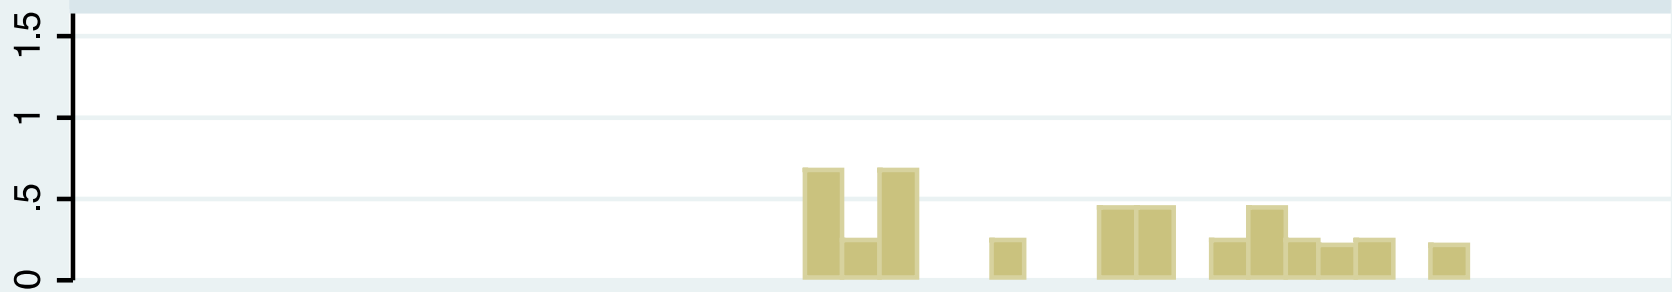

Peru

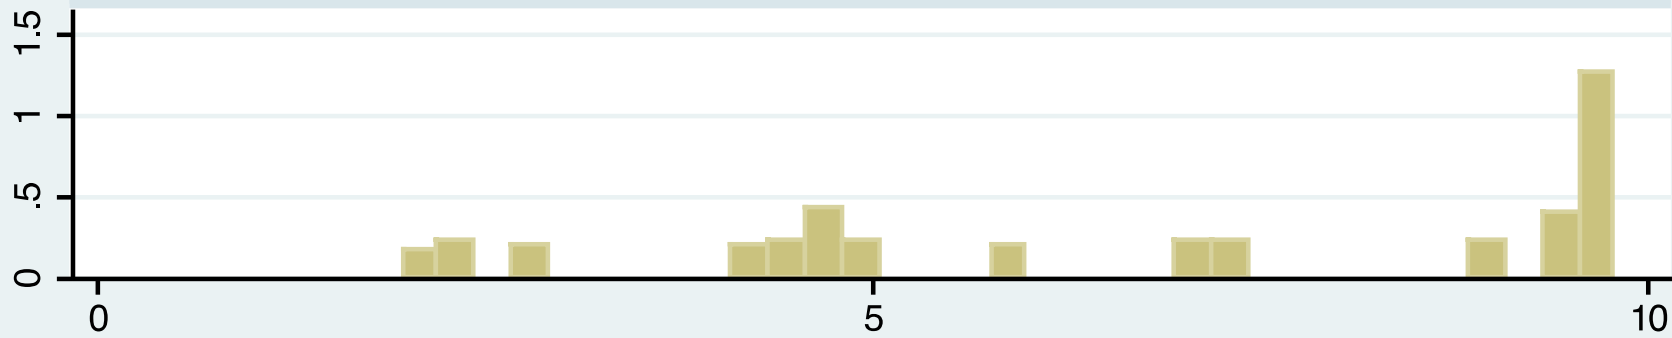

Built Environment

Supplement: MOESM5 [file 9492036]
